# Supplementary material
Source: publisher figshare collection journal article supplement (https://plos.figshare.com/articles/dataset/_/4871276)
Supplement: Supplementary file 1 [file 1]

Archive with 6 entries (6 files):
- S1 Fig.pdf
- S1 Table.pdf
- S2 Table.pdf
- S3 Table.pdf
- S4 Table.pdf
- S5 Table.pdf
