# Supplementary material
Source: publisher figshare collection journal article supplement (https://plos.figshare.com/articles/dataset/_/4871276)

## Supporting Information

### Functional decay in tree community within tropical fragmented landscapes: effects of landscape-scale forest cover

Larissa Rocha-Santos, Maíra Benchimol, Margaret Mayfield, Deborah Faria, Michaele Pessoa, Daniela Talora, Eduardo Mariano-Neto, Eliana Cazetta

**S1 Fig - Spatial correlation of species richness and abundance patterns.** Semivariograms of variables with spatial dependence: abundance of overall community, biotic-dispersed species and of small-seeded species. On the bottom, circles are sized proportional to the number of individuals in each landscape.

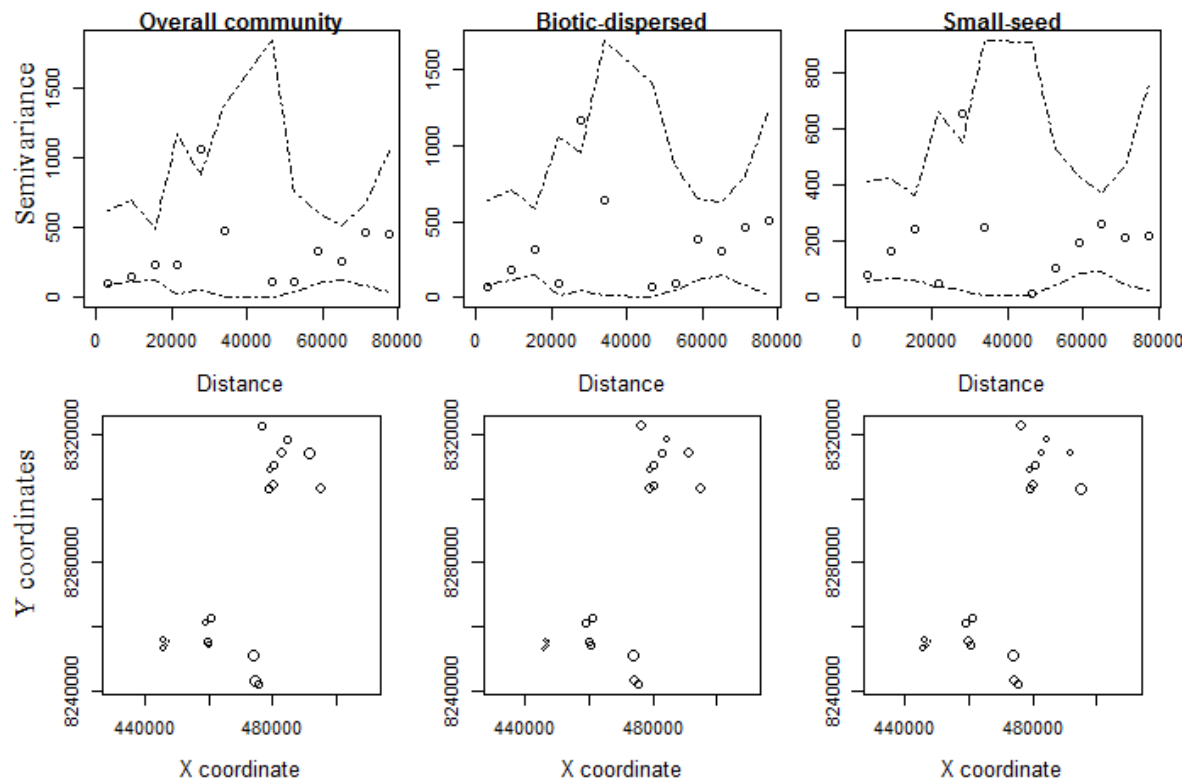

Supplement: Supplementary file 1 [file 1 › S1 Fig.pdf]
