# Supplementary material
Source: publisher figshare collection journal article supplement (https://plos.figshare.com/articles/dataset/_/4871276)
Supplement: Supplementary file 1 [file 1 › S1 Table.pdf]

## Supporting Information

### Functional decay in tree community within tropical fragmented landscapes: effects of landscape-scale forest cover

Larissa Rocha-Santos, Máira Benchimol, Margaret Mayfield, Deborah Faria, Michaele Pessoa, Daniela Talora, Eduardo Mariano-Neto, Eliana Cazetta

**S1 Table - Frequency of tree species and their respective classification on regeneration strategy, dispersion mode, and seed size, within 20 forest sites with different forest cover amount in northeastern Brazil.**

| FAMILIES AND SPECIES            | Regen. | Disp. | Seed | Nº ind.   |
|---------------------------------|--------|-------|------|-----------|
| <b>Achariaceae</b>              |        |       |      | <b>5</b>  |
| <i>Carpotroche brasiliensis</i> | ST     | BI    | LS   | 5         |
| <b>Anacardiaceae</b>            |        |       |      | <b>51</b> |
| <i>Astronium graveolens</i>     | ST     | AB    | NC   | 4         |
| <i>Tapirira guianensis</i>      | SI     | BI    | SS   | 37        |
| <i>Thyrsodium spruceanum</i>    | SI     | BI    | SS   | 10        |
| <b>Annonaceae</b>               |        |       |      | <b>55</b> |
| <i>Annona cacans</i>            | SI     | BI    | SS   | 2         |
| <i>Annona glabra</i>            | ST     | BI    | SS   | 3         |
| <i>Annona leptopetala</i>       | SI     | BI    | SS   | 3         |
| <i>Annona muricata</i>          | ST     | BI    | NC   | 2         |
| <i>Annona neolaurifolia</i>     | SI     | BI    | SS   | 10        |
| <i>Annona salzmännii</i>        | SI     | BI    | SS   | 1         |
| <i>Annona sylvatica</i>         | NC     | BI    | NC   | 2         |
| <i>Annonaceae 5</i>             | NC     | BI    | NC   | 1         |
| <i>Guatteria australis</i>      | SI     | BI    | SS   | 8         |
| <i>Guatteria oligocarpa</i>     | SI     | BI    | SS   | 3         |
| <i>Guatteria pogonopus</i>      | SI     | BI    | SS   | 2         |
| <i>Hornschuchia obliqua</i>     | SI     | BI    | NC   | 2         |
| <i>Pseudoxandra bahiensis</i>   | SI     | BI    | NC   | 3         |
| <i>Rollinia sp1</i>             | NC     | BI    | NC   | 1         |
| <i>Rollinia sp2</i>             | NC     | BI    | NC   | 1         |
| <i>Xylopia aromatica</i>        | SI     | BI    | SS   | 6         |
| <i>Xylopia frutescens</i>       | SI     | BI    | SS   | 1         |
| <i>Xylopia ochrantha</i>        | SI     | BI    | NC   | 1         |
| <i>Xylopia sericea</i>          | SI     | BI    | SS   | 3         |

|                                     |    |    |    |            |
|-------------------------------------|----|----|----|------------|
| <b>Apocynaceae</b>                  |    |    |    | <b>44</b>  |
| <i>Aspidosperma discolor</i>        | ST | AB | NC | 6          |
| <i>Aspidosperma illustre</i>        | ST | AB | NC | 1          |
| <i>Aspidosperma parvifolium</i>     | ST | AB | NC | 2          |
| <i>Aspidosperma spruceanum</i>      | ST | AB | NC | 1          |
| <i>Geissospermum laeve</i>          | SI | BI | SS | 2          |
| <i>Himatanthus articulatus</i>      | SI | AB | NC | 2          |
| <i>Himatanthus bracteatus</i>       | SI | AB | NC | 14         |
| <i>Himatanthus phagedaenicus</i>    | SI | AB | NC | 1          |
| <i>Lacmellea bahiensis</i>          | ST | BI | SS | 5          |
| <i>Macoubea guianensis</i>          | SI | BI | SS | 1          |
| <i>Malouetia cestroides</i>         | SI | NC | NC | 2          |
| <i>Rauvolfia grandiflora</i>        | SI | BI | SS | 3          |
| <i>Tabernaemontana brasiliensis</i> | SI | BI | NC | 1          |
| <i>Tabernaemontana salzmännii</i>   | ST | BI | SS | 3          |
| <b>Araliaceae</b>                   |    |    |    | <b>16</b>  |
| <i>Schefflera morototoni</i>        | SI | BI | SS | 16         |
| <b>Arecaceae</b>                    |    |    |    | <b>111</b> |
| <i>Allagoptera caudescens</i>       | SI | BI | LS | 35         |
| <i>Bactris ferruginea</i>           | SI | BI | LS | 3          |
| <i>Bactris setosa</i>               | SI | BI | LS | 1          |
| <i>Euterpe edulis</i>               | ST | BI | SS | 51         |
| <i>Syagrus botryophora</i>          | SI | BI | LS | 21         |
| <b>Bignoniaceae</b>                 |    |    |    | <b>17</b>  |
| <i>Bignoniaceae 1</i>               | NC | AB | NC | 1          |
| <i>Handroanthus chrysotrichus</i>   | ST | AB | NC | 4          |
| <i>Handroanthus impetiginosus</i>   | SI | AB | NC | 4          |
| <i>Jacaranda jasminoides</i>        | ST | AB | NC | 1          |
| <i>Jacaranda puberula</i>           | ST | AB | NC | 1          |
| <i>Jacaranda sp2</i>                | NC | AB | NC | 2          |
| <i>Tabebuia cassinoides</i>         | SI | AB | NC | 1          |
| <i>Tabebuia elliptica</i>           | SI | AB | NC | 3          |
| <b>Boraginaceae</b>                 |    |    |    | <b>30</b>  |
| <i>Cordia anabaptista</i>           | SI | BI | SS | 2          |
| <i>Cordia ecalyculata</i>           | SI | BI | SS | 15         |
| <i>Cordia glabrifolia</i>           | SI | BI | NC | 1          |
| <i>Cordia membranacea</i>           | SI | BI | NC | 2          |
| <i>Cordia mucronata</i>             | SI | BI | NC | 1          |
| <i>Cordia polycephala</i>           | SI | BI | SS | 1          |
| <i>Cordia sp3</i>                   | SI | BI | NC | 1          |
| <i>Cordia taguahyensis</i>          | SI | BI | SS | 2          |
| <i>Cordia toqueve</i>               | SI | BI | SS | 4          |

|                                |    |    |    |           |
|--------------------------------|----|----|----|-----------|
| <i>Cordia trachyphylla</i>     | SI | BI | NC | 1         |
| <b>Burseraceae</b>             |    |    |    | <b>35</b> |
| <i>Protium aracouchini</i>     | ST | BI | SS | 4         |
| <i>Protium heptaphyllum</i>    | ST | BI | SS | 18        |
| <i>Protium icariba</i>         | ST | BI | NC | 3         |
| <i>Protium sp1</i>             | ST | BI | NC | 1         |
| <i>Protium warmingiana</i>     | ST | BI | SS | 6         |
| <i>Tetragastris catuaba</i>    | ST | BI | NC | 3         |
| <b>Calophyllaceae</b>          |    |    |    | <b>1</b>  |
| <i>Kielmeyera elata</i>        | ST | NC | NC | 1         |
| <b>Caricaceae</b>              |    |    |    | <b>1</b>  |
| <i>Jacaratia heptaphylla</i>   | SI | BI | SS | 1         |
| <b>Caryocaraceae</b>           |    |    |    | <b>1</b>  |
| <i>Caryocar edule</i>          | ST | BI | LS | 1         |
| <b>Celastraceae</b>            |    |    |    | <b>9</b>  |
| <i>Cheiloclinium cognatum</i>  | ST | BI | LS | 3         |
| <i>Maytenus distichophylla</i> | SI | BI | SS | 2         |
| <i>Maytenus obtusifolia</i>    | ST | BI | NC | 1         |
| <i>Maytenus patens</i>         | SI | BI | NC | 2         |
| <i>Tontelea mauritioides</i>   | ST | BI | NC | 1         |
| <b>Chrysobalanaceae</b>        |    |    |    | <b>27</b> |
| <i>Couepia belemii</i>         | ST | BI | NC | 3         |
| <i>Couepia impressa</i>        | ST | BI | NC | 2         |
| <i>Couepia monteclarensis</i>  | ST | BI | NC | 3         |
| <i>Hirtella hebeclada</i>      | SI | BI | SS | 1         |
| <i>Licania discolor</i>        | ST | BI | SS | 1         |
| <i>Licania hoehnei</i>         | ST | BI | NC | 1         |
| <i>Licania lamentanda</i>      | ST | BI | LS | 5         |
| <i>Licania littoralis</i>      | ST | BI | SS | 1         |
| <i>Licania naviculistipula</i> | ST | BI | NC | 1         |
| <i>Parinari alvimii</i>        | ST | BI | SS | 5         |
| <i>Parinari sp1</i>            | ST | BI | NC | 4         |
| <b>Clusiaceae</b>              |    |    |    | <b>18</b> |
| <i>Garcinia gardneriana</i>    | SI | BI | SS | 1         |
| <i>Garcinia macrophylla</i>    | SI | BI | LS | 5         |
| <i>Symphonia globulifera</i>   | SI | BI | LS | 2         |
| <i>Tovomita brevistaminea</i>  | ST | BI | NC | 1         |
| <i>Tovomita choisyana</i>      | ST | BI | NC | 2         |
| <i>Tovomita mangle</i>         | ST | BI | SS | 7         |
| <b>Combretaceae</b>            |    |    |    | <b>4</b>  |
| <i>Buchenavia sp1</i>          | NC | BI | NC | 1         |
| <i>Combretum sp1</i>           | NC | BI | SS | 1         |

|                                     |    |    |    |            |
|-------------------------------------|----|----|----|------------|
| <i>Terminalia brasiliensis</i>      | ST | AB | NC | 2          |
| <b>Dichapetalaceae</b>              |    |    |    | <b>3</b>   |
| <i>Stephanopodium blanchetianum</i> | ST | BI | SS | 2          |
| <i>Stephanopodium organense</i>     | ST | BI | NC | 1          |
| <b>Ebenaceae</b>                    |    |    |    | <b>1</b>   |
| <i>Diospyros</i> sp1                | SI | BI | NC | 1          |
| <b>Elaeocarpaceae</b>               |    |    |    | <b>8</b>   |
| <i>Sloanea guianensis</i>           | ST | BI | SS | 6          |
| <i>Sloanea obtusifolia</i>          | ST | BI | SS | 1          |
| <i>Sloanea</i> sp1                  | ST | BI | NC | 1          |
| <b>Erythroxylaceae</b>              |    |    |    | <b>2</b>   |
| <i>Erythroxylum martii</i>          | SI | BI | SS | 1          |
| <i>Erythroxylum squamatum</i>       | SI | BI | SS | 1          |
| <b>Euphorbiaceae</b>                |    |    |    | <b>62</b>  |
| <i>Actinostemon appendiculatus</i>  | ST | AB | NC | 4          |
| <i>Actinostemon verticillatus</i>   | ST | AB | NC | 2          |
| <i>Alchornea glandulosa</i>         | SI | BI | SS | 1          |
| <i>Alchornea triplinervia</i>       | ST | BI | SS | 3          |
| <i>Aparisthium cordatum</i>         | SI | AB | NC | 3          |
| <i>Croton floribundus</i>           | SI | AB | NC | 3          |
| <i>Croton macrobothrys</i>          | SI | AB | NC | 3          |
| <i>Euphorbiaceae</i> 2              | NC | NC | NC | 2          |
| <i>Euphorbiaceae</i> 4              | NC | NC | NC | 1          |
| <i>Euphorbiaceae</i> 6              | NC | NC | NC | 1          |
| <i>Euphorbiaceae</i> 7              | NC | NC | NC | 3          |
| <i>Glycydendron amazonicum</i>      | SI | BI | SS | 4          |
| <i>Hevea brasiliensis</i>           | SI | AB | NC | 5          |
| <i>Mabea brasiliensis</i>           | SI | AB | NC | 4          |
| <i>Mabea piriri</i>                 | SI | AB | NC | 4          |
| <i>Ophthalmoblapton crassipes</i>   | ST | BI | NC | 5          |
| <i>Ophthalmoblapton pedunculare</i> | ST | BI | SS | 1          |
| <i>Pausandra megalophylla</i>       | ST | AB | NC | 1          |
| <i>Sapium glandulosum</i>           | ST | AB | NC | 3          |
| <i>Sebastiania gaudichaudii</i>     | SI | AB | NC | 2          |
| <i>Sebastiania jacobinensis</i>     | SI | AB | NC | 1          |
| <i>Senefeldera multiflora</i>       | ST | AB | NC | 5          |
| <i>Tetrorchidium rubrivenium</i>    | SI | BI | SS | 1          |
| <b>Fabaceae</b>                     |    |    |    | <b>234</b> |
| <i>Abarema turbinata</i>            | NC | NC | NC | 1          |
| <i>Aeschynomene sensitiva</i>       | NC | NC | NC | 1          |
| <i>Albizia pedicellaris</i>         | SI | AB | NC | 9          |
| <i>Andira anthelmia</i>             | ST | BI | LS | 1          |

|                                  |    |    |    |    |
|----------------------------------|----|----|----|----|
| <i>Andira fraxinifolia</i>       | SI | BI | LS | 1  |
| <i>Andira legalis</i>            | ST | BI | LS | 1  |
| <i>Andira lewisii</i>            | ST | BI | LS | 1  |
| <i>Andira marauensis</i>         | ST | NC | NC | 2  |
| <i>Andira</i> sp1                | NC | NC | NC | 1  |
| <i>Andira</i> sp2                | NC | NC | NC | 1  |
| <i>Andira</i> sp3                | NC | NC | NC | 1  |
| <i>Arapatiella emarginata</i>    | ST | AB | NC | 1  |
| <i>Arapatiella psilophylla</i>   | ST | AB | NC | 14 |
| <i>Bauhinia</i> sp1              | NC | AB | NC | 2  |
| <i>Bowdichia virgilioides</i>    | ST | AB | NC | 2  |
| <i>Calliandra calycina</i>       | ST | AB | NC | 1  |
| <i>Chamaecrista amorimii</i>     | ST | AB | NC | 2  |
| <i>Chamaecrista bahiae</i>       | ST | AB | NC | 9  |
| <i>Chamaecrista duartei</i>      | ST | AB | NC | 9  |
| <i>Copaifera langsdorffii</i>    | ST | BI | LS | 2  |
| <i>Copaifera trapezifolia</i>    | ST | BI | LS | 2  |
| <i>Dialium guianense</i>         | ST | BI | SS | 16 |
| <i>Diplotropis incexis</i>       | SI | AB | NC | 1  |
| <i>Dipteryx</i> sp1              | NC | AB | NC | 1  |
| <i>Enterolobium monjollo</i>     | SI | AB | NC | 2  |
| <i>Exostyles venusta</i>         | ST | AB | NC | 1  |
| <i>Hymenaea aurea</i>            | ST | BI | NC | 1  |
| <i>Hymenaea oblongifolia</i>     | ST | BI | SS | 2  |
| <i>Hymenolobium janeirense</i>   | SI | NC | NC | 1  |
| <i>Inga capitata</i>             | SI | BI | SS | 4  |
| <i>Inga cylindrica</i>           | SI | BI | SS | 2  |
| <i>Inga luschnathiana</i>        | SI | BI | NC | 1  |
| <i>Inga</i> sp1                  | SI | BI | NC | 1  |
| <i>Inga</i> sp2                  | SI | BI | NC | 3  |
| <i>Inga</i> sp3                  | SI | BI | NC | 1  |
| <i>Inga striata</i>              | SI | BI | SS | 4  |
| <i>Inga thibaudiana</i>          | SI | BI | LS | 8  |
| <i>Inga vera</i>                 | SI | BI | SS | 21 |
| <i>Machaerium hirtum</i>         | SI | AB | NC | 1  |
| <i>Macrolobium latifolium</i>    | ST | AB | NC | 7  |
| <i>Melanoxylon brauna</i>        | ST | AB | NC | 5  |
| <i>Mimosa</i> sp1                | NC | AB | NC | 1  |
| <i>Moldenhawera blanchetiana</i> | ST | AB | NC | 4  |
| <i>Moldenhawera floribunda</i>   | ST | AB | NC | 2  |
| <i>Parkia pendula</i>            | ST | AB | NC | 5  |
| <i>Peltogyne confertiflora</i>   | SI | AB | NC | 14 |
| <i>Peltogyne</i> sp1             | ST | AB | NC | 2  |

|                                     |    |    |    |           |
|-------------------------------------|----|----|----|-----------|
| <i>Piptadenia gonoacantha</i>       | SI | AB | NC | 3         |
| <i>Piptadenia paniculata</i>        | SI | AB | NC | 3         |
| <i>Plathymenia foliolosa</i>        | ST | AB | NC | 5         |
| <i>Poincianella pluviosa</i>        | SI | AB | NC | 5         |
| <i>Pterocarpus rohrii</i>           | ST | AB | NC | 9         |
| <i>Senegalia</i> sp1                | NC | AB | NC | 4         |
| <i>Senna multijuga</i>              | SI | AB | NC | 3         |
| <i>Stryphnodendron pulcherrimum</i> | SI | AB | NC | 4         |
| <i>Swartzia macrostachya</i>        | ST | BI | LS | 1         |
| <i>Swartzia oblata</i>              | ST | BI | LS | 2         |
| <i>Swartzia polita</i>              | ST | BI | LS | 4         |
| <i>Swartzia simplex</i>             | ST | BI | LS | 3         |
| <i>Tachigali densiflora</i>         | SI | AB | NC | 4         |
| <i>Tachigali paratyensis</i>        | SI | AB | NC | 4         |
| <i>Vatairea heteroptera</i>         | ST | AB | NC | 2         |
| <i>Vataireopsis araroba</i>         | ST | AB | NC | 1         |
| <i>Zollernia glabra</i>             | ST | BI | SS | 1         |
| <i>Zollernia latifolia</i>          | ST | BI | SS | 1         |
| <b>Humiriaceae</b>                  |    |    |    | <b>6</b>  |
| <i>Humiria balsamifera</i>          | ST | BI | NC | 2         |
| <i>Schistostemon retusum</i>        | ST | BI | LS | 2         |
| <i>Vantanea bahiaensis</i>          | SI | BI | SS | 1         |
| <i>Vantanea compacta</i>            | ST | BI | SS | 1         |
| <b>Hypericaceae</b>                 |    |    |    | <b>3</b>  |
| <i>Vismia baccifera</i>             | SI | BI | SS | 1         |
| <i>Vismia guianensis</i>            | SI | BI | SS | 1         |
| <i>Vismia latifolia</i>             | SI | BI | SS | 1         |
| <b> Icacinaceae</b>                 |    |    |    | <b>1</b>  |
| <i>Emmotum nitens</i>               | ST | BI | SS | 1         |
| <b>Lauraceae</b>                    |    |    |    | <b>91</b> |
| <i>Aniba intermedia</i>             | SI | BI | SS | 5         |
| <i>Beilschmiedia linharensis</i>    | ST | BI | SS | 1         |
| <i>Cryptocarya mandioccana</i>      | ST | BI | NC | 3         |
| <i>Lauraceae</i> sp2                | NC | BI | NC | 1         |
| <i>Lauraceae</i> sp3                | NC | BI | NC | 1         |
| <i>Lauraceae</i> sp4                | NC | BI | NC | 2         |
| <i>Licaria bahiana</i>              | SI | BI | SS | 8         |
| <i>Licaria guianensis</i>           | SI | BI | LS | 10        |
| <i>Nectandra membranacea</i>        | ST | BI | SS | 11        |
| <i>Nectandra purpurea</i>           | ST | BI | NC | 1         |
| <i>Nectandra</i> sp1                | NC | BI | NC | 7         |
| <i>Ocotea aciphylla</i>             | ST | BI | LS | 3         |

|                                 |    |    |    |           |
|---------------------------------|----|----|----|-----------|
| <i>Ocotea cernua</i>            | ST | BI | NC | 1         |
| <i>Ocotea divaricata</i>        | ST | BI | NC | 5         |
| <i>Ocotea elegans</i>           | SI | BI | SS | 5         |
| <i>Ocotea indecora</i>          | SI | BI | SS | 5         |
| <i>Ocotea insignis</i>          | ST | BI | LS | 1         |
| <i>Ocotea longifolia</i>        | SI | BI | SS | 2         |
| <i>Ocotea macrophylla</i>       | ST | BI | NC | 2         |
| <i>Ocotea montana</i>           | ST | BI | NC | 1         |
| <i>Ocotea notata</i>            | ST | BI | NC | 1         |
| <i>Ocotea oppositifolia</i>     | ST | BI | NC | 4         |
| <i>Ocotea percoriacea</i>       | ST | BI | NC | 2         |
| <i>Ocotea puberula</i>          | SI | BI | SS | 8         |
| <i>Ocotea</i> sp1               | NC | BI | NC | 1         |
| <b>Lecythidaceae</b>            |    |    |    | <b>62</b> |
| <i>Eschweilera ovata</i>        | SI | BI | LS | 50        |
| <i>Lecythis lurida</i>          | ST | BI | LS | 5         |
| <i>Lecythis pisonis</i>         | ST | BI | LS | 7         |
| <b>Malpighiaceae</b>            |    |    |    | <b>20</b> |
| <i>Byrsonima alvimii</i>        | ST | BI | SS | 2         |
| <i>Byrsonima fanshawei</i>      | ST | BI | NC | 2         |
| <i>Byrsonima laxiflora</i>      | ST | BI | SS | 1         |
| <i>Byrsonima sericea</i>        | SI | BI | SS | 12        |
| <i>Byrsonima stipulacea</i>     | SI | BI | SS | 3         |
| <b>Malvaceae</b>                |    |    |    | <b>65</b> |
| <i>Apeiba albiflora</i>         | SI | BI | SS | 1         |
| <i>Apeiba tibourbou</i>         | SI | AB | NC | 4         |
| <i>Basiloxylon brasiliensis</i> | SI | AB | NC | 1         |
| <i>Ceiba</i> sp1                | NC | AB | NC | 1         |
| <i>Eriotheca globosa</i>        | ST | AB | NC | 5         |
| <i>Eriotheca macrophylla</i>    | ST | AB | NC | 35        |
| <i>Hydrogaster trinervis</i>    | SI | AB | NC | 1         |
| <i>Luehea divaricata</i>        | SI | AB | NC | 4         |
| <i>Pavonia makoyana</i>         | ST | AB | NC | 1         |
| <i>Pavonia morii</i>            | ST | AB | NC | 2         |
| <i>Quararibea</i> sp1           | NC | BI | NC | 1         |
| <i>Quararibea turbinata</i>     | SI | BI | LS | 1         |
| <i>Sterculia apetala</i>        | ST | AB | NC | 8         |
| <b>Melastomataceae</b>          |    |    |    | <b>59</b> |
| <i>Henriettea succosa</i>       | SI | BI | SS | 16        |
| <i>Melastomataceae</i> 1        | SI | BI | NC | 1         |
| <i>Miconia amoena</i>           | SI | BI | SS | 3         |
| <i>Miconia centrodesma</i>      | SI | BI | SS | 6         |

|                                 |    |    |    |            |
|---------------------------------|----|----|----|------------|
| <i>Miconia dorsaliporosa</i>    | SI | BI | SS | 4          |
| <i>Miconia hypoleuca</i>        | SI | BI | SS | 7          |
| <i>Miconia minutiflora</i>      | SI | BI | SS | 2          |
| <i>Miconia mirabilis</i>        | SI | BI | SS | 3          |
| <i>Miconia prasina</i>          | SI | BI | SS | 10         |
| <i>Miconia speciosa</i>         | SI | BI | SS | 1          |
| <i>Tibouchina francavillana</i> | SI | AB | NC | 5          |
| <i>Tibouchina</i> sp1           | SI | AB | NC | 1          |
| <b>Meliaceae</b>                |    |    |    | <b>21</b>  |
| <i>Guarea blanchetii</i>        | ST | BI | SS | 7          |
| <i>Trichilia casaretti</i>      | ST | BI | SS | 1          |
| <i>Trichilia elegans</i>        | ST | BI | SS | 5          |
| <i>Trichilia lepidota</i>       | SI | BI | LS | 4          |
| <i>Trichilia silvatica</i>      | ST | BI | SS | 4          |
| <b>Moraceae</b>                 |    |    |    | <b>145</b> |
| <i>Artocarpus heterophyllus</i> | SI | BI | LS | 5          |
| <i>Brosimum guianense</i>       | SI | BI | SS | 6          |
| <i>Brosimum rubescens</i>       | ST | BI | SS | 13         |
| <i>Clarisia biflora</i>         | SI | BI | NC | 3          |
| <i>Clarisia ilicifolia</i>      | SI | BI | SS | 2          |
| <i>Ficus americana</i>          | ST | BI | NC | 1          |
| <i>Ficus christianii</i>        | ST | BI | NC | 2          |
| <i>Ficus hirsuta</i>            | SI | BI | SS | 1          |
| <i>Ficus insipida</i>           | ST | BI | SS | 2          |
| <i>Ficus</i> sp1                | NC | BI | NC | 1          |
| <i>Helicostylis tomentosa</i>   | SI | BI | SS | 99         |
| <i>Maclura tinctoria</i>        | ST | BI | SS | 2          |
| <i>Sorocea bonplandii</i>       | ST | BI | SS | 1          |
| <i>Sorocea guilleminiana</i>    | ST | BI | SS | 7          |
| <b>Myristicaceae</b>            |    |    |    | <b>30</b>  |
| <i>Virola gardneri</i>          | ST | BI | LS | 15         |
| <i>Virola officinalis</i>       | ST | BI | LS | 15         |
| <b>Myrtaceae</b>                |    |    |    | <b>166</b> |
| <i>Calyptrotrichia</i> sp1      | NC | BI | NC | 1          |
| <i>Calyptrotrichia</i> sp4      | NC | BI | NC | 1          |
| <i>Campomanesia dichotoma</i>   | SI | BI | SS | 2          |
| <i>Campomanesia laurifolia</i>  | ST | BI | SS | 3          |
| <i>Eugenia adenantha</i>        | SI | BI | NC | 3          |
| <i>Eugenia astringens</i>       | ST | BI | NC | 1          |
| <i>Eugenia ayacuchae</i>        | ST | BI | NC | 3          |
| <i>Eugenia candolleana</i>      | ST | BI | SS | 1          |
| <i>Eugenia excelsa</i>          | ST | BI | NC | 3          |

|                                |    |    |    |   |
|--------------------------------|----|----|----|---|
| <i>Eugenia florida</i>         | ST | BI | SS | 1 |
| <i>Eugenia itapemirimensis</i> | ST | BI | SS | 1 |
| <i>Eugenia lacistema</i>       | ST | BI | NC | 1 |
| <i>Eugenia luschnathiana</i>   | ST | BI | SS | 1 |
| <i>Eugenia magnifica</i>       | ST | BI | NC | 8 |
| <i>Eugenia melanogyna</i>      | ST | BI | LS | 3 |
| <i>Eugenia pauciflora</i>      | ST | BI | SS | 1 |
| <i>Eugenia pisiformis</i>      | ST | BI | SS | 1 |
| <i>Eugenia platyphylla</i>     | ST | BI | NC | 4 |
| <i>Eugenia plicata</i>         | ST | BI | NC | 1 |
| <i>Eugenia prasina</i>         | SI | BI | NC | 3 |
| <i>Eugenia pruniformis</i>     | ST | BI | SS | 2 |
| <i>Eugenia rostrata</i>        | ST | BI | NC | 1 |
| <i>Eugenia schottiana</i>      | ST | BI | NC | 7 |
| <i>Eugenia</i> sp1             | ST | BI | NC | 1 |
| <i>Eugenia</i> sp10            | ST | BI | SS | 5 |
| <i>Eugenia</i> sp11            | ST | BI | NC | 1 |
| <i>Eugenia</i> sp13            | ST | BI | LS | 1 |
| <i>Eugenia</i> sp15            | ST | BI | NC | 1 |
| <i>Eugenia</i> sp17            | ST | BI | NC | 1 |
| <i>Eugenia</i> sp22            | ST | BI | NC | 1 |
| <i>Eugenia</i> sp23            | ST | BI | NC | 2 |
| <i>Eugenia</i> sp25            | ST | BI | NC | 1 |
| <i>Eugenia</i> sp28            | ST | BI | NC | 1 |
| <i>Eugenia</i> sp5             | ST | BI | NC | 1 |
| <i>Eugenia</i> sp6             | ST | BI | NC | 1 |
| <i>Eugenia</i> sp7             | ST | BI | NC | 1 |
| <i>Eugenia</i> sp9             | ST | BI | NC | 1 |
| <i>Eugenia subterminalis</i>   | ST | BI | SS | 3 |
| <i>Eugenia umbellata</i>       | ST | BI | SS | 1 |
| <i>Gomidesia fenzliana</i>     | ST | BI | SS | 1 |
| <i>Marlierea excoriata</i>     | ST | BI | NC | 2 |
| <i>Marlierea obversa</i>       | ST | BI | SS | 5 |
| <i>Marlierea racemosa</i>      | ST | BI | SS | 1 |
| <i>Marlierea rufa</i>          | ST | BI | SS | 3 |
| <i>Marlierea</i> sp1           | ST | BI | NC | 1 |
| <i>Marlierea</i> sp2           | ST | BI | SS | 1 |
| <i>Marlierea</i> sp3           | ST | BI | NC | 1 |
| <i>Marlierea</i> sp4           | ST | BI | NC | 1 |
| <i>Marlierea sucrei</i>        | ST | BI | SS | 5 |
| <i>Myrcia anceps</i>           | ST | BI | NC | 1 |
| <i>Myrcia calyptranthoides</i> | ST | BI | NC | 1 |
| <i>Myrcia carvalhoi</i>        | ST | BI | SS | 1 |

|                                  |    |    |    |            |
|----------------------------------|----|----|----|------------|
| <i>Myrcia eximia</i>             | ST | BI | NC | 1          |
| <i>Myrcia gigantea</i>           | ST | BI | SS | 3          |
| <i>Myrcia pseudomarlierea</i>    | ST | BI | NC | 1          |
| <i>Myrcia racemosa</i>           | ST | BI | SS | 6          |
| <i>Myrcia</i> sp1                | ST | BI | NC | 1          |
| <i>Myrcia</i> sp11               | ST | BI | NC | 1          |
| <i>Myrcia</i> sp12               | ST | BI | NC | 3          |
| <i>Myrcia</i> sp14               | ST | BI | NC | 2          |
| <i>Myrcia</i> sp18               | ST | BI | NC | 1          |
| <i>Myrcia</i> sp20               | ST | BI | NC | 1          |
| <i>Myrcia</i> sp24               | ST | BI | NC | 1          |
| <i>Myrcia</i> sp25               | ST | BI | NC | 1          |
| <i>Myrcia</i> sp27               | ST | BI | NC | 1          |
| <i>Myrcia</i> sp28               | ST | BI | NC | 1          |
| <i>Myrcia</i> sp3                | ST | BI | NC | 2          |
| <i>Myrcia</i> sp9                | ST | BI | NC | 3          |
| <i>Myrcia splendens</i>          | SI | BI | SS | 15         |
| <i>Myrcia sylvatica</i>          | SI | BI | SS | 2          |
| <i>Myrcia vittoriana</i>         | ST | BI | SS | 1          |
| <i>Myrciaria guaquiea</i>        | ST | BI | SS | 2          |
| <i>Myrtaceae</i> 15              | ST | BI | NC | 1          |
| <i>Myrtaceae</i> 32              | ST | BI | NC | 1          |
| <i>Myrtaceae</i> 34              | ST | BI | NC | 1          |
| <i>Myrtaceae</i> 35              | ST | BI | NC | 1          |
| <i>Myrtaceae</i> 5               | ST | BI | NC | 1          |
| <i>Neomitranthes langsdorfii</i> | ST | BI | NC | 2          |
| <i>Plinia callosa</i>            | ST | BI | NC | 3          |
| <i>Plinia edulis</i>             | ST | BI | LS | 1          |
| <i>Plinia grandifolia</i>        | ST | BI | SS | 1          |
| <i>Plinia muricata</i>           | ST | BI | NC | 2          |
| <i>Plinia rara</i>               | ST | BI | NC | 2          |
| <i>Plinia</i> sp1                | ST | BI | NC | 1          |
| <b>Nyctaginaceae</b>             |    |    |    | <b>102</b> |
| <i>Guapira hirsuta</i>           | ST | BI | NC | 11         |
| <i>Guapira laxiflora</i>         | ST | BI | SS | 9          |
| <i>Guapira nitida</i>            | ST | BI | SS | 56         |
| <i>Guapira obtusata</i>          | ST | BI | NC | 1          |
| <i>Guapira opposita</i>          | ST | BI | SS | 8          |
| <i>Guapira</i> sp1               | NC | BI | NC | 1          |
| <i>Neea duckei</i>               | ST | BI | NC | 2          |
| <i>Neea floribunda</i>           | ST | BI | SS | 1          |
| <i>Neea macrophylla</i>          | ST | BI | SS | 4          |
| <i>Neea madeirana</i>            | ST | BI | NC | 2          |

|                                    |    |    |    |           |
|------------------------------------|----|----|----|-----------|
| <i>Neea verticillata</i>           | ST | BI | NC | 7         |
| <b>Olacaceae</b>                   |    |    |    | <b>16</b> |
| <i>Aptandra</i> sp1                | NC | NC | NC | 1         |
| <i>Aptandra tubicina</i>           | ST | BI | NC | 4         |
| <i>Heisteria ovata</i>             | ST | BI | NC | 1         |
| <i>Heisteria perianthomega</i>     | ST | BI | SS | 5         |
| <i>Heisteria</i> sp2               | NC | BI | LS | 1         |
| <i>Schoepfia brasiliensis</i>      | ST | BI | NC | 1         |
| <i>Tetrastylidium brasiliense</i>  | ST | BI | NC | 2         |
| <i>Tetrastylidium grandifolium</i> | ST | BI | LS | 1         |
| <b>Peraceae</b>                    |    |    |    | <b>32</b> |
| <i>Chaetocarpus echinocarpus</i>   | SI |    | NC | 1         |
| <i>Pera glabrata</i>               | SI |    | SS | 5         |
| <i>Pogonophora schomburgkiana</i>  | SI |    | NC | 26        |
| <b>Phyllanthaceae</b>              |    |    |    | <b>3</b>  |
| <i>Hyeronima alchorneoides</i>     | SI | BI | SS | 2         |
| <i>Margaritaria nobilis</i>        | ST | BI | SS | 1         |
| <b>Picramniaceae</b>               |    |    |    | <b>1</b>  |
| <i>Picramnia glazioviana</i>       | NC | NC | NC | 1         |
| <b>Polygonaceae</b>                |    |    |    | <b>9</b>  |
| <i>Coccoloba arborescens</i>       | SI | BI | NC | 1         |
| <i>Coccoloba bullata</i>           | ST | BI | NC | 2         |
| <i>Coccoloba glaziovii</i>         | SI | BI | NC | 1         |
| <i>Coccoloba oblonga</i>           | SI | BI | NC | 1         |
| <i>Coccoloba rosea</i>             | ST | BI | SS | 3         |
| <i>Coccoloba</i> sp1               | NC | BI | NC | 1         |
| <b>Primulaceae</b>                 |    |    |    | <b>2</b>  |
| <i>Myrsine coriacea</i>            | SI | BI | SS | 1         |
| <i>Myrsine guianensis</i>          | SI | NC | NC | 1         |
| <b>Proteaceae</b>                  |    |    |    | <b>3</b>  |
| <i>Roupala</i> sp1                 | NC | AB | NC | 3         |
| <b>Quiinaceae</b>                  |    |    |    | <b>1</b>  |
| <i>Quiina glaziovii</i>            | ST | BI | SS | 1         |
| <b>Rubiaceae</b>                   |    |    |    | <b>67</b> |
| <i>Alseis floribunda</i>           | SI | AB | NC | 1         |
| <i>Alseis latifolia</i>            | ST | AB | NC | 1         |
| <i>Amaioua guianensis</i>          | ST | BI | SS | 3         |
| <i>Bathysa mendoncae</i>           | ST | BI | NC | 4         |
| <i>Bathysa</i> sp1                 | NC | BI | NC | 1         |
| <i>Chomelia pedunculosa</i>        | ST | BI | SS | 2         |
| <i>Cordia bahiensis</i>            | ST | BI | NC | 1         |
| <i>Cordia</i> sp1                  | NC | BI | NC | 1         |

|                                  |    |    |    |           |
|----------------------------------|----|----|----|-----------|
| <i>Coussarea carvalhoi</i>       | ST | BI | NC | 5         |
| <i>Coussarea ilheotica</i>       | ST | BI | SS | 4         |
| <i>Faramea biflora</i>           | ST | BI | SS | 1         |
| <i>Guettarda platyphylla</i>     | ST | BI | NC | 1         |
| <i>Guettarda</i> sp1             | NC | BI | NC | 1         |
| <i>Guettarda viburnoides</i>     | ST | BI | SS | 1         |
| <i>Ixora muelleri</i>            | ST | BI | SS | 3         |
| <i>Palicourea blanchetiana</i>   | ST | BI | SS | 1         |
| <i>Posoqueria latifolia</i>      | ST | BI | SS | 2         |
| <i>Psychotria bahiensis</i>      | ST | BI | NC | 1         |
| <i>Psychotria mapourioides</i>   | ST | BI | SS | 9         |
| <i>Psychotria</i> sp1            | ST | BI | NC | 1         |
| <i>Psychotria tenerior</i>       | ST | BI | NC | 2         |
| <i>Psychotria vellosiana</i>     | ST | BI | SS | 2         |
| <i>Randia nitida</i>             | ST | BI | NC | 1         |
| <i>Rubiaceae</i> 1               | ST | BI | NC | 2         |
| <i>Rubiaceae</i> 2               | ST | BI | NC | 1         |
| <i>Rubiaceae</i> 4               | ST | BI | NC | 3         |
| <i>Rubiaceae</i> 6               | ST | BI | NC | 2         |
| <i>Rubiaceae</i> 7               | ST | BI | NC | 1         |
| <i>Rudgea involucrata</i>        | ST | BI | SS | 1         |
| <i>Rudgea pachyphylla</i>        | ST | BI | NC | 1         |
| <i>Simira glaziovii</i>          | SI | AB | NC | 4         |
| <i>Tocoyena bullata</i>          | ST | BI | NC | 3         |
| <b>Rutaceae</b>                  |    |    |    | <b>17</b> |
| <i>Almeidea caerulea</i>         | ST | AB | NC | 1         |
| <i>Conchocarpus macrophyllus</i> | ST | NC | NC | 1         |
| <i>Dictyoloma vandellianum</i>   | ST | AB | NC | 1         |
| <i>Hortia arborea</i>            | ST | BI | SS | 2         |
| <i>Pilocarpus grandiflorus</i>   | SI | AB | NC | 1         |
| <i>Pilocarpus</i> sp1            | ST | AB | NC | 1         |
| <i>Pilocarpus spicatus</i>       | ST | AB | NC | 1         |
| <i>Rutaceae</i> 1                | NC | NC | NC | 1         |
| <i>Zanthoxylum nemorale</i>      | ST | BI | NC | 1         |
| <i>Zanthoxylum rhoifolium</i>    | SI | BI | SS | 7         |
| <b>Salicaceae</b>                |    |    |    | <b>46</b> |
| <i>Banara brasiliensis</i>       | SI | BI | SS | 1         |
| <i>Casearia arborea</i>          | SI | BI | NC | 3         |
| <i>Casearia bahiensis</i>        | ST | BI | NC | 3         |
| <i>Casearia commersoniana</i>    | ST | BI | SS | 25        |
| <i>Casearia silvestris</i>       | SI | BI | SS | 9         |
| <i>Casearia</i> sp1              | NC | BI | NC | 1         |

|                                      |    |    |    |            |
|--------------------------------------|----|----|----|------------|
| <i>Macrothumia kuhlmannii</i>        | SI | BI | NC | 2          |
| <i>Salicaceae 1</i>                  | NC | BI | NC | 1          |
| <i>Salicaceae 2</i>                  | NC | BI | NC | 1          |
| <b>Sapindaceae</b>                   |    |    |    | <b>34</b>  |
| <i>Allophylus edulis</i>             | ST | BI | SS | 7          |
| <i>Allophylus sericeus</i>           | SI | BI | SS | 2          |
| <i>Cupania impressinervia</i>        | ST | BI | SS | 2          |
| <i>Cupania oblongifolia</i>          | ST | BI | SS | 1          |
| <i>Cupania racemosa</i>              | SI | BI | SS | 1          |
| <i>Cupania rugosa</i>                | SI | BI | NC | 2          |
| <i>Cupania scrobiculata</i>          | SI | BI | SS | 1          |
| <i>Cupania sp2</i>                   | NC | BI | SS | 1          |
| <i>Cupania sp4</i>                   | NC | BI | NC | 2          |
| <i>Cupania tenuivalvis</i>           | ST | BI | NC | 1          |
| <i>Cupania torta</i>                 | ST | BI | NC | 5          |
| <i>Matayba discolor</i>              | SI | BI | SS | 1          |
| <i>Matayba guianensis</i>            | ST | BI | SS | 1          |
| <i>Matayba juglandifolia</i>         | SI | BI | NC | 1          |
| <i>Sapindaceae 1</i>                 | NC | NC | NC | 2          |
| <i>Scyphonychium multiflorum</i>     | ST | AB | NC | 1          |
| <i>Talisia cerasina</i>              | SI | BI | SS | 2          |
| <i>Talisia esculenta</i>             | ST | BI | SS | 1          |
| <b>Sapotaceae</b>                    |    |    |    | <b>129</b> |
| <i>Chrysophyllum gonocarpum</i>      | ST | BI | SS | 2          |
| <i>Chrysophyllum lucentifolium</i>   | ST | BI | NC | 1          |
| <i>Chrysophyllum splendens</i>       | ST | BI | SS | 13         |
| <i>Diploon cuspidatum</i>            | ST | BI | SS | 3          |
| <i>Ecclinusa ramiflora</i>           | ST | BI | SS | 22         |
| <i>Manilkara longifolia</i>          | ST | BI | SS | 2          |
| <i>Manilkara maxima</i>              | ST | BI | SS | 4          |
| <i>Manilkara multifida</i>           | ST | BI | NC | 2          |
| <i>Manilkara salzmannii</i>          | ST | BI | SS | 6          |
| <i>Micropholis crassipedicellata</i> | ST | BI | SS | 4          |
| <i>Micropholis gardneriana</i>       | ST | BI | SS | 14         |
| <i>Micropholis guyanensis</i>        | ST | BI | SS | 1          |
| <i>Pouteria atlantica</i>            | ST | BI | NC | 2          |
| <i>Pouteria bangii</i>               | ST | BI | LS | 12         |
| <i>Pouteria bapeba</i>               | ST | BI | SS | 1          |
| <i>Pouteria bilocularis</i>          | ST | BI | NC | 1          |
| <i>Pouteria grandiflora</i>          | ST | BI | LS | 10         |
| <i>Pouteria guianensis</i>           | ST | BI | LS | 1          |
| <i>Pouteria macahensis</i>           | ST | BI | NC | 1          |

|                                |    |    |    |             |
|--------------------------------|----|----|----|-------------|
| <i>Pouteria macrophylla</i>    | ST | BI | SS | 5           |
| <i>Pouteria microstrigosa</i>  | ST | BI | NC | 1           |
| <i>Pouteria peduncularis</i>   | ST | BI | LS | 2           |
| <i>Pouteria procera</i>        | ST | BI | SS | 2           |
| <i>Pouteria reticulata</i>     | ST | BI | LS | 4           |
| <i>Pouteria</i> sp1            | NC | BI | NC | 1           |
| <i>Pouteria</i> sp3            | NC | BI | NC | 1           |
| <i>Pouteria</i> sp4            | NC | BI | NC | 2           |
| <i>Pouteria venosa</i>         | ST | BI | LS | 2           |
| <i>Pradosia kuhlmannii</i>     | ST | BI | NC | 1           |
| <i>Pradosia lactescens</i>     | ST | BI | SS | 3           |
| <i>Pradosia</i> sp2            | ST | BI | NC | 1           |
| <i>Sapotaceae</i> sp3          | ST | BI | NC | 2           |
| <b>Simaroubaceae</b>           |    |    |    | <b>2</b>    |
| <i>Simarouba amara</i>         | ST | BI | SS | 2           |
| <b>Siparunaceae</b>            |    |    |    | <b>9</b>    |
| <i>Siparuna guianensis</i>     | ST | BI | SS | 9           |
| <b>Solanaceae</b>              |    |    |    | <b>4</b>    |
| <i>Aureliana fasciculata</i>   | SI | BI | SS | 1           |
| <i>Solanum sooretamum</i>      | SI | BI | SS | 1           |
| <i>Solanum</i> sp2             | NC | BI | SS | 2           |
| <b>Urticaceae</b>              |    |    |    | <b>26</b>   |
| <i>Cecropia cecropiifolia</i>  | SI | BI | LS | 1           |
| <i>Cecropia hololeuca</i>      | SI | BI | SS | 2           |
| <i>Cecropia pachystachya</i>   | SI | BI | SS | 2           |
| <i>Pourouma guianensis</i>     | SI | BI | SS | 1           |
| <i>Pourouma mollis</i>         | SI | BI | SS | 6           |
| <i>Pourouma velutina</i>       | SI | BI | SS | 14          |
| <b>Violaceae</b>               |    |    |    | <b>48</b>   |
| <i>Paypayrola blanchetiana</i> | ST | AB | NC | 4           |
| <i>Paypayrola</i> sp1          | ST | AB | NC | 1           |
| <i>Rinorea guianensis</i>      | ST | AB | NC | 43          |
| <b>Total</b>                   |    |    |    | <b>1955</b> |

Legend: regeneration strategy (ST: shade-tolerant, SI: shade-intolerant), dispersal mode (AB: abiotic-dispersed, BI: biotic-dispersed) and seed size (SS: small-seeded, LS: large-seeded). NC: no classification.
