# Supplementary material
Source: publisher figshare collection journal article supplement (https://plos.figshare.com/articles/dataset/_/4871276)
Supplement: Supplementary file 1 [file 1 › S2 Table.pdf]

## Supporting Information

### Functional decay in tree community within tropical fragmented landscapes: effects of landscape-scale forest cover

Larissa Rocha-Santos, Máira Benchimol, Margaret Mayfield, Deborah Faria, Michaele Pessoa, Daniela Talora, Eduardo Mariano-Neto, Eliana Cazetta

**S2 Table - Ranking selection of best models explaining species richness and abundance of trees in function of forest cover amount at landscape-scale, for overall community and for the most important families.** Models that did not present convergence on the likelihood estimates were excluded from the model selection procedure. The most parsimonious models (linear – Li, logistic – Lo, null – Nu and power-law – Po) are highlight in gray.

| Var. | Richness |       |    |                | Abundance |       |    |                |
|------|----------|-------|----|----------------|-----------|-------|----|----------------|
|      | Model    | dAICc | df | w <sub>i</sub> | Model     | dAICc | df | w <sub>i</sub> |
| Ov   | Li       | 0.0   | 3  | 0.6            | Li        | 0.0   | 5  | 0.99           |
|      | Lo       | 1.7   | 4  | 0.2            | Nu        | 15.2  | 4  | 0.00           |
|      | Po       | 2.0   | 3  | 0.2            | Po        | 24.0  | 5  | <0.001         |
|      | Nu       | 12.7  | 2  | <0.001         |           |       |    |                |
| Mry  | Po       | 0.0   | 3  | 0.52           | Li        | 0.0   | 3  | 0.48           |
|      | Li       | 0.3   | 3  | 0.45           | Po        | 0.7   | 3  | 0.35           |
|      | Nu       | 5.5   | 2  | 0.03           | Lo        | 2.2   | 4  | 0.16           |
|      |          |       |    |                | Nu        | 7.4   | 2  | 0.01           |
| Fab  | Po       | 0.0   | 3  | 0.52           | Nu        | 0.0   | 2  | 0.50           |
|      | Nu       | 0.9   | 2  | 0.32           | Po        | 1.8   | 3  | 0.21           |
|      | Li       | 2.4   | 3  | 0.16           | Li        | 2.0   | 3  | 0.19           |
|      |          |       |    |                | Lo        | 3.2   | 4  | 0.10           |
| Lau  | Lo       | 0.0   | 4  | 0.91           | Lo        | 0.0   | 4  | 0.72           |
|      | Po       | 5.4   | 3  | 0.06           | Po        | 3.0   | 3  | 0.16           |
|      | Li       | 7.3   | 3  | 0.02           | Li        | 4.4   | 3  | 0.08           |
|      | Nu       | 10.3  | 2  | 0.01           | Nu        | 5.5   | 2  | 0.05           |
| Rub  | Li       | 0.0   | 3  | 0.57           | Li        | 0.0   | 3  | 0.33           |
|      | Nu       | 1.9   | 2  | 0.22           | Lo        | 0.4   | 4  | 0.27           |
|      | Po       | 2.0   | 3  | 0.21           | Nu        | 0.6   | 2  | 0.24           |
|      |          |       |    |                | Po        | 1.4   | 3  | 0.16           |
| Sap  | Po       | 0.0   | 3  | 0.56           | Li        | 0.0   | 3  | 0.57           |
|      | Li       | 0.4   | 3  | 0.44           | Po        | 0.5   | 3  | 0.43           |
|      | Nu       | 30.6  | 2  | <0.001         | Nu        | 24.8  | 2  | <0.001         |

Legend: Variables (Var.); overall (Ov); Mrytaceae (Mry); Rubiaceae (Rub); Sapotaceae (Sap); Fabaceae (Fab); Lauraceae (lau); difference in AICc from the best model (dAIC); parameter number of the model (df); AICc weight (wi).
