# Supplementary material
Source: publisher figshare collection journal article supplement (https://plos.figshare.com/articles/dataset/_/4871276)
Supplement: Supplementary file 1 [file 1 › S3 Table.pdf]

## Supporting Information

### Functional decay in tree community within tropical fragmented landscapes: effects of landscape-scale forest cover

Larissa Rocha-Santos, Máira Benchimol, Margaret Mayfield, Deborah Faria, Michaela Pessoa, Daniela Talora, Eduardo Mariano-Neto, Eliana Cazetta

**S3 Table - Ranking selection of best models explaining species richness and abundance of trees in function of forest cover amount at landscape-scale, for each functional trait.** Models that did not present convergence on the likelihood estimates were excluded from the model selection procedure. The most parsimonious models (linear – Li, logistic – Lo, null – Nu and power-law – Po) are highlight in gray.

| Var. | Richness |       |    |                | Abundance |       |    |                |
|------|----------|-------|----|----------------|-----------|-------|----|----------------|
|      | Model    | dAICc | df | w <sub>i</sub> | Model     | dAICc | df | w <sub>i</sub> |
| Si   | Nu       | 0.0   | 2  | 0.6            | Nu        | 0.0   | 2  | 0.5            |
|      | Po       | 2.3   | 3  | 0.2            | Li        | 1.3   | 3  | 0.3            |
|      | Li       | 2.5   | 3  | 0.2            | Po        | 2.1   | 3  | 0.2            |
| St   | Po       | 0.0   | 3  | 0.5            | Po        | 0.0   | 3  | 0.9            |
|      | Li       | 0.8   | 3  | 0.3            | Li        | 3.6   | 3  | 0.1            |
|      | Lo       | 2.0   | 4  | 0.2            | Nu        | 29.2  | 2  | <0.001         |
|      | Nu       | 18.4  | 2  | <0.001         |           |       |    |                |
| Ad   | Nu       | 0.0   | 2  | 0.6            | Nu        | 0.0   | 4  | 0.8            |
|      | Po       | 2.5   | 3  | 0.2            | Li        | 3.4   | 5  | 0.2            |
|      | Li       | 2.8   | 3  | 0.1            | Po        | 15.7  | 5  | <0.001         |
|      | Lo       | 4.0   | 4  | 0.1            |           |       |    |                |
| Bd   | Li       | 0.0   | 3  | 0.6            | Po        | 0.0   | 3  | 0.8            |
|      | Po       | 0.8   | 3  | 0.4            | Li        | 3.7   | 3  | 0.1            |
|      | Nu       | 15.4  | 2  | <0.001         | Lo        | 4.1   | 4  | 0.1            |
|      |          |       |    |                | Nu        | 12.9  | 2  | 0.0            |
| Ls   | Nu       | 0.0   | 2  | 0.4            | Nu        | 0.0   | 2  | 0.6            |
|      | Po       | 0.7   | 3  | 0.3            | Po        | 2.7   | 3  | 0.2            |
|      | Li       | 0.8   | 3  | 0.3            | Li        | 2.8   | 3  | 0.2            |
|      |          |       |    |                | Lo        | 6.0   | 4  | 0.0            |
| Ss   | Po       | 0.0   | 3  | 0.6            | Li        | 0.0   | 5  | 0.7            |
|      | Li       | 2.3   | 3  | 0.2            | Nu        | 1.4   | 4  | 0.3            |
|      | Lo       | 2.8   | 4  | 0.2            | Po        | 15.5  | 5  | <0.001         |
|      | Nu       | 12.8  | 2  | 0.0            |           |       |    |                |

Legend: Variable (Var.); shade-intolerant (Si); shade-tolerant (St); abiotic-dispersed (Ad); biotic-dispersed (Bd); large-seeded (Ls); small-seeded (Ss); difference in AICc from the best model (dAIC); parameter number of the model (df); AICc weight ( $w_i$ ).
