# Supplementary material
Source: publisher figshare collection journal article supplement (https://plos.figshare.com/articles/dataset/_/4871276)
Supplement: Supplementary file 1 [file 1 › S4 Table.pdf]

## Supporting Information

### Functional decay in tree community within tropical fragmented landscapes: effects of landscape-scale forest cover

Larissa Rocha-Santos, Maíra Benchimol, Margaret Mayfield, Deborah Faria, Michaela Pessoa, Daniela Talora, Eduardo Mariano-Neto, Eliana Cazetta

**S4 Table - Ranking selection of best models explaining the richness and abundance of overall community and the most important families recorded for this study in function of forest cover amount and distance of nearest edge.** The most parsimonious (Nu - null; Co - Forest cover; Ed - Forest edge distance; Co + Ed - Forest cover plus edge distance) models are shown in gray.

| Var.               | Models  | RICHNESS |     |                | Models  | ABUNDANCE |      |                |
|--------------------|---------|----------|-----|----------------|---------|-----------|------|----------------|
|                    |         | dAIC     | df  | w <sub>i</sub> |         | dAIC      | df   | w <sub>i</sub> |
| Ov <sup>1,3</sup>  | Co + Ed | 0.0      | 3.0 | 0.50           | Co      | 0.0       | 5.0  | 0.78           |
|                    | Co      | 1.0      | 2.0 | 0.30           | Co + Ed | 3.3       | 6.0  | 0.15           |
|                    | Ed      | 1.9      | 2.0 | 0.20           | Ed      | 4.7       | 5.0  | 0.07           |
|                    | Nu      | 31.2     | 1.0 | 0.00           | Nu      | 15.2      | 4.0  | 0.00           |
| Mry <sup>1,1</sup> | Co      | 0.0      | 2.0 | 0.75           | Co      | 0.0       | 2.0  | 0.74           |
|                    | Co + Ed | 2.5      | 3.0 | 0.22           | Co + Ed | 2.3       | 3.0  | 0.24           |
|                    | Ed      | 6.1      | 2.0 | 0.04           | Ed      | 7.6       | 2.0  | 0.02           |
|                    | Nu      | 20.2     | 1.0 | 0.00           | Nu      | 27.9      | 1.0  | 0.00           |
| Fab <sup>2,2</sup> | Co      | 0.0      | 2.1 | 0.46           | Co + Ed | 0.0       | 12.1 | 0.99           |
|                    | Nu      | 1.6      | 1.0 | 0.21           | Co      | 10.0      | 9.4  | 0.01           |
|                    | Co + Ed | 1.9      | 6.1 | 0.18           | Ed      | 27.4      | 7.5  | 0.00           |
|                    | Ed      | 2.1      | 4.1 | 0.16           | Nu      | 50.8      | 1.0  | 0.00           |
| Lau <sup>2,2</sup> | Ed      | 0.0      | 7.3 | 0.56           | Ed      | 0.0       | 8.0  | 0.68           |
|                    | Co + Ed | 1.7      | 8.2 | 0.24           | Co + Ed | 1.6       | 9.0  | 0.31           |
|                    | Co      | 2.0      | 5.0 | 0.21           | Co      | 8.4       | 6.2  | 0.01           |
|                    | Nu      | 19.5     | 1.0 | 0.00           | Nu      | 41.1      | 1.0  | 0.00           |
| Rub <sup>1,1</sup> | Ed      | 0.0      | 2.0 | 0.63           | Ed      | 0.0       | 2.0  | 0.62           |
|                    | Co + Ed | 2.3      | 3.0 | 0.20           | Co + Ed | 2.6       | 3.0  | 0.17           |
|                    | Nu      | 3.9      | 1.0 | 0.09           | Co      | 3.6       | 2.0  | 0.10           |
|                    | Co      | 4.2      | 2.0 | 0.08           | Nu      | 3.7       | 1.0  | 0.10           |
| Sap <sup>1,1</sup> | Co      | 0.0      | 2.0 | 0.80           | Co      | 0.0       | 2.0  | 0.80           |
|                    | Co + Ed | 2.8      | 3.0 | 0.20           | Co + Ed | 2.7       | 3.0  | 0.21           |
|                    | Ed      | 10.8     | 2.0 | 0.00           | Ed      | 18.6      | 2.0  | 0.00           |
|                    | Nu      | 28.9     | 1.0 | 0.00           | Nu      | 44.7      | 1.0  | 0.00           |

<sup>1</sup>GLMM test; <sup>2</sup>GAMM test; <sup>3</sup>SLM test. The first number refers to the test used for richness and the second for abundance. Values of difference in AICc from the best model (dAIC); parameter number of the model (df); AICc weight (wi).
