# Supplementary material
Source: publisher figshare collection journal article supplement (https://plos.figshare.com/articles/dataset/_/4871276)
Supplement: Supplementary file 1 [file 1 › S5 Table.pdf]

## Supporting Information

### Functional decay in tree community within tropical fragmented landscapes: effects of landscape-scale forest cover

Larissa Rocha-Santos, Máira Benchimol, Margaret Mayfield, Deborah Faria, Michaele Pessoa, Daniela Talora, Eduardo Mariano-Neto, Eliana Cazetta

**S5 Table - Ranking selection of best models explaining the richness and abundance of each functional trait in function of forest cover amount and distance of nearest edge.** The most parsimonious models (Nu - null; Co - Forest cover; Ed - Forest edge distance; Co + Ed - Forest cover plus edge distance) are shown in gray.

| Var.              | Models  | RICHNESS |     |                | Models  | ABUNDANCE |      |                |
|-------------------|---------|----------|-----|----------------|---------|-----------|------|----------------|
|                   |         | dAIC     | df  | w <sub>i</sub> |         | dAIC      | df   | w <sub>i</sub> |
| Si <sup>1,1</sup> | Nu      | 0.0      | 1.0 | 0.52           | Co      | 0.0       | 2.0  | 0.41           |
|                   | Co      | 1.8      | 2.0 | 0.21           | Ed      | 1.0       | 2.0  | 0.25           |
|                   | Ed      | 2.4      | 2.0 | 0.15           | Nu      | 1.2       | 1.0  | 0.23           |
|                   | Co + Ed | 3.0      | 3.0 | 0.12           | Co + Ed | 2.7       | 3.0  | 0.11           |
| St <sup>1,2</sup> | Co      | 0.0      | 2.0 | 0.77           | Co      | 0.0       | 7.3  | 0.59           |
|                   | Co + Ed | 2.4      | 3.0 | 0.23           | Co + Ed | 0.7       | 12.7 | 0.41           |
|                   | Ed      | 21.6     | 2.0 | 0.00           | Ed      | 14.5      | 7.9  | 0.00           |
|                   | Nu      | 65.6     | 1.0 | 0.00           | Nu      | 116.5     | 1.0  | 0.00           |
| Ad <sup>1,3</sup> | Nu      | 0.0      | 1.0 | 0.58           | Nu      | 0.0       | 4.0  | 0.73           |
|                   | Co      | 2.2      | 2.0 | 0.20           | Co      | 3.4       | 5.0  | 0.13           |
|                   | Ed      | 2.4      | 2.0 | 0.17           | Ed      | 3.5       | 5.0  | 0.13           |
|                   | Co + Ed | 4.9      | 3.0 | 0.05           | Co + Ed | 7.6       | 6.0  | 0.02           |
| Bd <sup>1,2</sup> | Co      | 0.0      | 2.0 | 0.55           | Co + Ed | 0.0       | 4.3  | 0.71           |
|                   | Co + Ed | 0.5      | 3.0 | 0.43           | Co      | 1.8       | 5.0  | 0.29           |
|                   | Ed      | 6.7      | 2.0 | 0.02           | Ed      | 15.0      | 2.0  | 0.00           |
|                   | Nu      | 40.6     | 1.0 | 0.00           | Nu      | 49.8      | 1.0  | 0.00           |
| Ls <sup>1,1</sup> | Co      | 0.0      | 2.0 | 0.36           | Nu      | 0.0       | 1.0  | 0.59           |
|                   | Nu      | 0.3      | 1.0 | 0.30           | Ed      | 2.3       | 2.0  | 0.19           |
|                   | Ed      | 0.7      | 2.0 | 0.25           | Co      | 2.4       | 2.0  | 0.18           |
|                   | Co + Ed | 2.7      | 3.0 | 0.09           | Co + Ed | 5.1       | 3.0  | 0.05           |
| Ss <sup>2,3</sup> | Co      | 0.0      | 2.0 | 0.41           | Ed      | 0.0       | 5.0  | 0.38           |
|                   | Co + Ed | 0.2      | 3.1 | 0.36           | Co      | 0.1       | 5.0  | 0.37           |
|                   | Ed      | 1.1      | 2.0 | 0.23           | Nu      | 1.5       | 4.0  | 0.19           |
|                   | Nu      | 16.1     | 1.0 | 0.00           | Co + Ed | 3.6       | 6.0  | 0.06           |

<sup>1</sup>GLMM test; <sup>2</sup>GAMM test; <sup>3</sup>SLM test. The first number refers to the test used for richness and the second for abundance. Values of difference in AICc from the best model (dAIC); parameter number of the model (df); AICc weight ( $w_i$ ).
